# **Nanoscale mechanical stimulation method for quantifying *C. elegans* mechanosensory behavior and memory**

Takuma Sugi<sup>\*, \*\*, †</sup>, Etsuko Okumura<sup>\*\*, \*\*\*</sup>, Kaori Kiso<sup>\*\*</sup>, and Ryuji Igarashi<sup>\*, \*\*\*\*</sup>

\* PRESTO, Japanese Science and Technology Agency, 4-1-8 Honcho, Kawaguchi, Saitama 332-0012, Japan

\*\* Institute for Integrated Cell-Material Sciences (WPI-iCeMS), Kyoto University, Yoshida-Honmachi, Sakyo-ku, Kyoto 606-8501, Japan

\*\*\* Laboratory of Terrestrial Microbial Ecology, Graduate School of Agriculture, Kyoto University, Kitashirakawa-Oiwake Cho, Sakyo-ku, Kyoto 606-8502, Japan

\*\*\*\* Department of Molecular Engineering, Graduate School of Engineering, Kyoto University, Nishikyo-ku, Kyoto 615-8510, Japan

---

<sup>†</sup> To whom correspondence should be addressed.

E-mail: [tsugi@icems.kyoto-u.ac.jp](mailto:tsugi@icems.kyoto-u.ac.jp)

20    **Abstract**

21    Here, we establish a novel economic system to quantify *C. elegans* mechanosensory behavior  
 22    and memory by a controllable nanoscale mechanical stimulation. Using piezoelectric sheet  
 23    speaker, we can flexibly change the vibration properties at a nanoscale displacement level and  
 24    quantify behavioral responses and memory under the control of each vibration property. This  
 25    system will facilitate understanding of physiological aspects of *C. elegans* mechanosensory  
 26    behavior and memory.

27    **Keywords:** Mechanosensory behavior, memory, withdrawal escape response, *C. elegans*

28

29

## 30 **Introduction**

31 Mechanical forces such as touch, vibration and gravity make vital influences on development  
32 and homeostasis of living organisms<sup>1,2</sup>. Animals cope with these stimuli by modifying behavior  
33 and thereby achieve physical interactions with environment<sup>3</sup>. The mechanism underlying  
34 mechanosensory behavior has been studied at various model organisms from bacteria and  
35 archaea to mammals<sup>4,5</sup>. However, physiological aspects of those behaviors, such as force and  
36 duration enough to sense, are not well understood.

37       Mechanosensory behavior in *C. elegans* is a traditional paradigm in which to examine  
38 mechanism underlying a response to mechanical forces<sup>6-8</sup>. Worms usually respond to  
39 nonlocalized vibrations such as the tapping of a cultivated Petri plate with a reversal escape  
40 response<sup>7</sup>. In addition, after spaced training for repeated mechanical tap stimulation, worms can  
41 habituate to the stimulus and exhibit a decrease in the magnitude of the withdrawal escape  
42 response. Therefore, worms can alter behavior based on their past experience<sup>9</sup>. Because the  
43 neural circuit underlying this behavior was completely determined, we can easily investigate  
44 neural and molecular mechanisms using *C. elegans* cell-specific genetic methods<sup>9,10</sup>. In general,  
45 the choice of technique to impose mechanical stimulation and to readout behavioral output is  
46 critical for understanding physiology of animal behavior. In *C. elegans*, mechanical stimulation  
47 has been provided by tapping only a single plate using a solenoid tapper<sup>11</sup> or a ROBO cylinder<sup>10</sup>  
48 or by the manual box-drop method<sup>9</sup>, in which a plastic box containing multiple Petri plates is  
49 manually dropped onto a hard surface from a constant height. However, in these methods, it has  
50 been difficult to precisely change the vibration properties such as frequency, amplitude and  
51 duration.

52       At a cellular level experiment, several mechanical stimulation methods have been  
53 established for the study of mechanotransduction<sup>12</sup>. These methods include mechano-clamp  
54 using piezo-driven system<sup>13,14</sup>, surface elongation of a flexible silicone elastomer<sup>15,16</sup>, and force

55 application by magnetic particles<sup>17-19</sup>. In addition to these spatially confined methods, Nikukar  
56 et al. have recently reported an interesting method, "nanokicking", using piezo actuator and  
57 demonstrated to evoke nanoscale nonlocalized vibration with high frequency (up to 1 kHz)  
58 across the entire surface of the Petri plates<sup>20,21</sup>. However, in this strategy, it was not  
59 demonstrated to evoke the frequency above 1 kHz. Furthermore, this method has not been  
60 applied to a living animal level experiment, particularly to its behavioral experiments.

61 In this study, we designed an economic nonlocalized vibration device using piezoelectric  
62 sheet speaker. This device allows for elaborately changing the vibration parameters and setting  
63 these parameters in a desired temporal pattern. Using this device, we clearly quantified reversal  
64 responses and memory of worms for nonlocalized vibration. Thus, our new device will facilitate  
65 understanding of physiological aspects *C. elegans* mechanosensory behavior by titrating  
66 vibration properties in the future.

67 We previously established the tap stimulation system using the cylinder and actuator,  
68 because this method was successfully applied to the quantification of tap habituation behavior in  
69 other groups<sup>10,11</sup>. In this system, amplitude of the nonlocalized vibration could be roughly  
70 changed, whereas its frequency and duration could not. Therefore, instead of the previous  
71 system, we used a piezoelectric speaker to evoke nonlocalized vibration on an agar surface of an  
72 NGM plate (Fig. 1 and 2A). The NGM plate on which worms were cultivated (Fig. 1A Step 1)  
73 was placed on a circular-shaped actuator of a piezoelectric speaker (Fig. 1A Step 2, and Fig.  
74 2B-D). The actuator was connected to an amplifier (Fig. 2E). This device was also connected to  
75 an earphone jack of a desktop computer through an earphone splitter. The earphone splitter  
76 enables us to evoke nonlocalized vibration to multiple NGM plates at the same time.

77 Amplitude of vibration can be set by volume control of a computer, and this sound  
78 volume level was changed in the range of 0 to 100%. On the other hand, the free download  
79 software was used for setting the frequency and duration of the vibration. The frequency of

80 vibration can be changed in the range of 0 to 5 kHz. The minimum duration of stimulation is 0.5  
81 sec. Moreover, this device potentially enables us to generate various waveforms such as sine  
82 wave, square wave, pulse wave and white noise.

83 Furthermore, semi-automation of training of worms was also needed for quantifying  
84 habituation memory due to its laborious protocol. The conventional training protocol consisted  
85 of five blocks of 20 mechanical stimuli (60 sec interstimulus interval) with a 1 hr rest period  
86 between each block<sup>22</sup>. To automatically train large populations of worms, we used a mouse  
87 macro system that enables us to program the automatic mouse cursor movement on the  
88 computer screen (Fig. 1A Step 3 and Supplementary Fig. 1). To accurately examine habituation  
89 memory of trained worms, we have simultaneously prepared untrained worms as a control.

90 We used laser interferometry to quantify mechanical stimuli evoked by our piezoelectric  
91 speaker system. We played 440 Hz sound (the standard tuning frequency) on a piezoelectric  
92 speaker and validated the vibration on the center of an agar surface in a Petri plate (Fig. 3A).  
93 Expectedly, as shown in Fig. Fig 3B, we succeeded in detecting 440 Hz frequency. Therefore,  
94 we have changed the vibration frequency on the center of agar surfaces using WaveGene (Fig.  
95 3C). All the vibration frequencies determined by WaveGene (minimum frequency, 250 Hz) were  
96 clearly detected by the vibrometer. In addition, 80 Hz vibration was correctly detected by the  
97 accelerometer. These results indicate that our piezoelectric speaker system allows for evoking  
98 vibration with accurate frequency on the center of agar surface.

99 We have changed amplitude of vibration by volume control of computer. As shown in Fig.  
100 3D, the amplitude quantified by vibrometer on an agar surface linearly increased as the sound  
101 volume level increased, and reached a plateau at 80% of the computer sound level. Importantly,  
102 we could detect 1 kHz vibrations with 10% and 20% of the computer sound level as the  
103 nanometer scale displacements. Therefore, we next changed the sound level in the range of 0 to  
104 30% by 2% and quantified the displacement in each sound level (Fig. 3E). We could detect the

105 30.4 nm displacement in 2% of the sound level, and the displacement increased within a  
106 nanometer range as the sound volume level became higher. These results reveal that our  
107 economic piezoelectric speaker system allows for changing amplitude of vibration at a  
108 nanoscale resolution.

109 Then, we tried to measure 1 kHz vibration (50% of the computer sound level) evoked by  
110 WaveGene at the several positions on the agar surface (Fig. 3A and 3F). As a result, we detected  
111 almost no frequency deviations across the surface of the Petri plate. These results indicate that  
112 our piezoelectric speaker enables us to stimulate almost all worms under the same vibration  
113 properties, regardless of their positions on an agar surface.

114 We prepared both untrained and trained worms and quantified their mean reversal  
115 distances at 16 hrs after habituation training (Fig. 1A Step 4-5, Fig. 1B, Fig. 3). Untrained  
116 worms exhibited reversal responses to vibration with 1 kHz of frequency, 4.9  $\mu$ m of amplitude  
117 (computer sound level, 100%) and 1 sec of duration (Fig. 3A and 3C). The mean ( $\pm$ SEM)  
118 reversal distance of these untrained worms (N = 110) in response to vibration was 1.82 mm  
119 ( $\pm$ 0.10 mm) (Fig. 3C). On the other hand, in our previous tapping method, mean reversal  
120 distance of worms (N = 98) was 1.07 mm ( $\pm$ 0.06 mm) (Fig. 3C), which was comparable with  
121 that reported in the other group's paper<sup>11</sup>. Therefore, these quantifications have indicated that  
122 worms stimulated by our new system could exhibit longer reversal distances than those  
123 stimulated by the old tapping system.

124 We further examined habituation memory of trained worms (Fig. 3B). The mean  
125 reversal distance of the trained worms (N = 135) in response to vibration was 1.36 mm ( $\pm$ 0.09  
126 mm). This result revealed that worms trained by our new system showed significantly reduced  
127 reversal distance compared with untrained worms (Fig. 3C). Thus, our new system could clearly  
128 induce mechanosensory memory through habituation training.

129 In summary, our system allows for not only quantification of mechanosensory behavior

130 but also training of worms and quantifications of their memory. One of the important  
131 advantages for the researcher is that the new system with a device to quantify stimulus is an  
132 economic setup (< approximately 130 dollars / a single vibration device) and easily replicated in  
133 other laboratories. In addition, we can easily change the vibration properties. Our behavioral  
134 experiments have proved the capability of this system. In addition, this system is so compact as  
135 to be integrated into another experimental device such as a calcium imaging system. Therefore,  
136 our new system will facilitate investigation of physiological aspects of behavior and neural  
137 circuitry in the future.

138

### 139 **Online Methods**

#### 140 *Strain preparation*

141 We used wild-type N2 Bristol strain for all behavioral experiments. This strain has been  
142 maintained and handled using standard methods<sup>23</sup>.

143

#### 144 *Vibration device construction and it's validation*

145 To control properties of nonlocalized vibration precisely, a new system was constructed  
146 using the piezoelectric sheet speaker (THRIVE, pzBAZZ  $\mu$ Speaker B35) as an actuator and the  
147 amplifier module (THRIVE, 0530AMPZ) connected to a computer earphone jack via an  
148 earphone splitter. The diameter of sheet speaker was 42 mm, and frequency could be increased  
149 at least up to 5 kHz. The amplitude could be also changed by volume control of the computer in  
150 the range of 0 to 100% (Dell PRECISION T1650 desktop computer). The minimum duration of  
151 vibration is 0.5 sec. The mechanical stimuli were quantified by laser vibrometer V100  
152 (Denshigiken Corp.) with PicoScope oscilloscope.

153

#### 154 *Behavioral recording*

155 All worms' behaviors were recorded at > 7.0 frames / sec using USB-controlled CCD  
156 cameras (Sentech, STCTB83USB-AS), which were each coupled to a 25 mm focal-length  
157 C-mount machine vision lens (Azure, AZURE-2514MM) and C-mount adaptor (5 mm thickness,  
158 30CMA-R). Each pixel in the captured images corresponds to a  $25.4 \mu\text{m} \times 25.4 \mu\text{m}$  area in each  
159 Petri plate. The total field captured was  $26.0 \text{ mm} \times 19.5 \text{ mm}$ .

160

# 161 *Software*

162 Two free download software were used for automatic stimulation; WaveGene Ver. 1.50 for  
163 control of vibration properties and mouse macro HiMacroEX 2.46 for automatic habituation  
164 instead of manual operation. The software was compiled and bench marked on a Dell  
165 PRECISION T1650 desktop computer (Dell). The script written in HiMacroEx 2.46 was  
166 indicated in the Supplementary Fig. 1.

167 The reversal distance was calculated according to a previously reported method<sup>10</sup>. At first,  
168 an acquired AVI format movie was transformed into Tiff-format sequential images using ImageJ  
169 software (NIH). This sequential image file was used for subsequent motion analysis of each  
170 worm. Image-processing software for the quantification of each worm's reversal distance was  
171 written in Mathematica 9.0 (Wolfram). The coordinate of each worm at initial frame was  
172 extracted manually. Then, the centroid of each worm was calculated and a track was generated  
173 by matching centroid positions between sequential frames. This track was used to calculate  
174 reversal distance. Initially, reversal distance of each worm was calculated automatically by the  
175 software. After this initial calculation, a frame number in which reversal movement was  
176 completed was manually confirmed for each worm using output result. Then, correct frame  
177 numbers for worms that indicate incorrect frame numbers in the initial calculation was extracted  
178 manually and put into the software for recalculation of their reversal distances. The detail  
179 instruction for this software was described in the Supplemental file.



180

# 181 *Habituation training*

182 Worms were cultivated on 60 mm Petri plates (Thermo Fisher Scientific, #150288)  
 183 containing 10 mL of NGM with 2% agar, on which *Escherichia coli* OP50 was seeded. On the  
 184 first day, 8–9 worms were deposited onto each NGM plate and cultivated at 20 °C. After 3 hrs,  
 185 the deposited P0 worms were removed to segregate the F1 progeny. The progeny were  
 186 cultivated for 64 hrs at 20 °C. An NGM plate on which worms were cultivated was placed on an  
 187 actuator of a piezoelectric sheet speaker and stimulated through WaveGene. The training  
 188 protocol was flexibly customized using Mouse macro HiMacroEX 2.46. In this study, the  
 189 conventional training<sup>22</sup> was adopted for worms within a 20 °C incubator (ADVANTEC). The  
 190 nonlocalized vibrations were evoked at every 1 min for 20 times, and this stimulation sequence  
 191 was repeated five times with a 1 hr interval.

192

# 193 **Acknowledgements**

194 We thank *Caenorhabditis* Genetic Center for sharing strains. T.S. and R.I. were supported by the  
 195 Japan Society for the promotion of Science, Japan Science and Technology Agency under  
 196 Precursory Research for Embryonic Science and Technology (PRESTO). T.S. was supported by  
 197 Mochida Memorial Foundation for Medical and Pharmaceutical Research.

198

# 199 **References**

- 200 1. Hoffman, B. D., Grashoff, C. & Schwartz, M. A. Dynamic molecular processes mediate  
 201 cellular mechanotransduction. *Nature* **475**, 316–323 (2011).
- 202 2. Delmas, P., Hao, J. & Rodat-Despoix, L. Molecular mechanisms of  
 203 mechanotransduction in mammalian sensory neurons. *Nat Rev Neurosci* **12**, 139–153  
 204 (2011).

- 205 3. Ramdya, P. *et al.* Mechanosensory interactions drive collective behaviour in *Drosophila*.  
206 *Nature* (2014). doi:10.1038/nature14024
- 207 4. Hamill, O. P. & Martinac, B. Molecular basis of mechanotransduction in living cells.  
208 *Physiol Rev* **81**, 685–740 (2001).
- 209 5. Iskratsch, T., Wolfenson, H. & Sheetz, M. P. Appreciating force and shape—the rise of  
210 mechanotransduction in cell biology. *Nat Rev Mol Cell Biol* **15**, 825–833 (2014).
- 211 6. Chalfie, M. Neurosensory mechanotransduction. *Nat Rev Mol Cell Biol* **10**, 44–52  
212 (2009).
- 213 7. Bozorgmehr, T., Ardiel, E. L., McEwan, A. H. & Rankin, C. H. Mechanisms of  
214 plasticity in a *Caenorhabditis elegans* mechanosensory circuit. *Front Physiol* **4**, 88  
215 (2013).
- 216 8. Delmas, P. & Coste, B. Mechano-gated ion channels in sensory systems. *Cell* **155**, 278–  
217 284 (2013).
- 218 9. Timbers, T. A. & Rankin, C. H. Tap withdrawal circuit interneurons require CREB for  
219 long-term habituation in *Caenorhabditis elegans*. *Behav Neurosci* **125**, 560–566 (2011).
- 220 10. Sugi, T., Ohtani, Y., Kumiya, Y., Igarashi, R. & Shirakawa, M. High-throughput optical  
221 quantification of mechanosensory habituation reveals neurons encoding memory in  
222 *Caenorhabditis elegans*. *Proceedings of the National Academy of Sciences* **111**, 17236–  
223 17241 (2014).
- 224 11. Swierczek, N. A., Giles, A. C., Rankin, C. H. & Kerr, R. A. High-throughput behavioral  
225 analysis in *C. elegans*. *Nat Meth* **8**, 592–598 (2011).
- 226 12. Hao, J. & Delmas, P. Recording of mechanosensitive currents using piezoelectrically  
227 driven mechanostimulator. *Nat Protoc* **6**, 979–990 (2011).
- 228 13. McCarter, G. C., Reichling, D. B. & Levine, J. D. Mechanical transduction by rat dorsal  
229 root ganglion neurons in vitro. *Neurosci. Lett.* **273**, 179–182 (1999).

230 14. Coste, B. *et al.* Piezo1 and Piezo2 are essential components of distinct mechanically  
231 activated cation channels. *Science* **330**, 55–60 (2010).

232 15. Cheng, C.-M. *et al.* Probing localized neural mechanotransduction through  
233 surface-modified elastomeric matrices and electrophysiology. *Nat Protoc* **5**, 714–724  
234 (2010).

235 16. Bhattacharya, M. R. C. *et al.* Radial stretch reveals distinct populations of  
236 mechanosensitive mammalian somatosensory neurons. *Proceedings of the National*  
237 *Academy of Sciences* **105**, 20015–20020 (2008).

238 17. Tseng, P., Judy, J. W. & Di Carlo, D. Magnetic nanoparticle-mediated massively parallel  
239 mechanical modulation of single-cell behavior. *Nat Meth* **9**, 1113–1119 (2012).

240 18. Etoc, F. *et al.* Subcellular control of Rac-GTPase signalling by magnetogenetic  
241 manipulation inside living cells. *Nature Nanotechnology* **8**, 193–198 (2013).

242 19. Sniadecki, N. J. A tiny touch: activation of cell signaling pathways with magnetic  
243 nanoparticles. *Endocrinology* **151**, 451–457 (2010).

244 20. Nikukar, H. *et al.* Osteogenesis of mesenchymal stem cells by nanoscale  
245 mechanotransduction. *ACS Nano* **7**, 2758–2767 (2013).

246 21. Childs, P. G. *et al.* Use of nanoscale mechanical stimulation for control and manipulation  
247 of cell behaviour. *Acta Biomater* (2015). doi:10.1016/j.actbio.2015.11.045

248 22. Rose, J. K., Kaun, K. R. & Rankin, C. H. A new group-training procedure for  
249 habituation demonstrates that presynaptic glutamate release contributes to long-term  
250 memory in *Caenorhabditis elegans*. *Learn Mem* **9**, 130–137 (2002).

251 23. Brenner, S. The genetics of *Caenorhabditis elegans*. *Genetics* **77**, 71–94 (1974).

252

253

## 254 **Figure legends**

255 Fig. 1 Flowchart for quantification of mechanosensory behavior and memory using  
256 piezoelectric speaker in *C. elegans*.

257 (A) Experimental procedure. The flowchart is indicated for examining mechanosensory memory.  
258 In the case of only examining behavioral response to mechanical stimulus, step 3 could be  
259 skipped. (B) Calculation procedure. The detail instruction is described in Supplementary file.

260

261 Fig. 2 Design of a new nonlocalized stimulation device.

262 (A) Schematic overview of the new device.

263 (B-D) Photos of an actuator without (B) and with a black sheet (C), and with both the black  
264 sheet and a Petri plate (D). A black sheet is required for enhancing the contrast between worms  
265 and background in each acquired image. The petri plate was fixed by the two screws.  
266 Habituation training was conducted inside an incubator and simultaneously applied for the five  
267 plates.

268 (E) Amplifier connected to an actuator and a computer.

269

270 Fig. 3 Validation of the new device by laser interferometry.

271 (A) Schematic of the Petri plate, the piezoelectric speaker, and food area on the agar surface.  
272 The speaker was represented by dashed line. Displacement was quantified at the indicated  
273 positions (1 to 5) as described in Fig. 3 D

274 (B) Detection of the standard tuning frequency (440 Hz) by laser interferometry. The laser was  
275 focused on the center of an agar surface.

276 (C) Quantification of various frequencies of vibrations evoked by the new device. The  
277 frequency of the evoked vibration was changed using WaveGene, and quantifications were  
278 performed by laser interferometry. The computer sound level was set as 50%.

279 (D) Quantifications of the displacements induced by 1kHz vibration in the sound level range of  
280 0 to 100%.

281 (E) Detailed quantifications of the displacements induced by 1kHz vibration, in which the  
282 computer sound level was changed in the range of 0 to 20% by 2%.

283 (F) Quantifications of the displacements at the several positions on the agar surface. 1 kHz  
284 vibration (computer sound level, 50%) was evoked by WaveGene. Numbers represent distances  
285 from the center (1 = center, 2 = 5 mm from center, 3 = 10 mm from center, 4 = 15 mm from  
286 center, 5 = 20 mm from center).

287

288 Fig. 4 Behavioral experiments.

289 (A) Trajectories of worms' reversal responses to nonlocalized vibration induced by the new  
290 system. The vibration with 630 Hz of frequency, 4.5μm of amplitude (computer sound level,  
291 50%), 1 sec of duration was delivered to the Petri plate at 10 sec after starting behavioral  
292 recording. The white and black arrow heads indicate start and end positions of each worm's  
293 reversal movement, respectively. Worms that suddenly accelerated forward movement in  
294 response to vibration were not marked by the arrow heads. Scale bar, 2 mm.

295 (B) Scheme of behavioral experiments. The conventional protocol (five blocks of 20 tap stimuli  
296 (60 sec interstimulus interval) with a 1 hr rest period between each block) was used for  
297 habituation training. Behavioral quantifications were performed at 16 hrs after habituation  
298 training.

299 (C) Quantifications of mechanosensory behavior and memory using the old tap system and the  
300 new piezoelectric sheet speaker system. Reversal distances of worms that were not trained (NT)  
301 and trained with the conventional protocol (T) were quantified at 16 hrs after training. The  
302 vibration with 1 kHz of frequency, 4.9 μm of amplitude (computer sound level, 100%), 1 sec of  
303 duration was delivered to the Petri plate at 10 sec after starting behavioral recording. More than

304 80 worms were examined in each experimental condition. Error bars indicate SEMs. Statistical  
305 comparisons were performed using t tests.  $*P < 0.01$   
306

# Fig. 1

## A. Experiment

1. Cultivation of worms on the NGM plate for 64 hrs

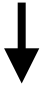

2. Place the NGM plate on the piezo actuator

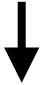

3. Automatic habituation training using HiMacroEx 2.46 along with WaveGene 1.5

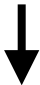

Rest for 16 hrs

4. Behavioral test using WaveGene 1.5

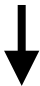

5. Output AVI file

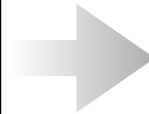

## B. Reversal distance calculation

1. Transform AVI format file into Tiff file using ImageJ

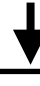

2. Read out Tiff file by Mathematica script

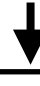

3. Manually extract coordinate of each worm at initial frame

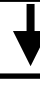

4. Automatic generation of track by matching centroid positions of each worm between sequential frames

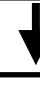

5. Calculation of reversal distances using each worm's track

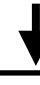

6. Recalculation of reversal distances for worms that indicate false result in initial calculation

**Fig. 2**

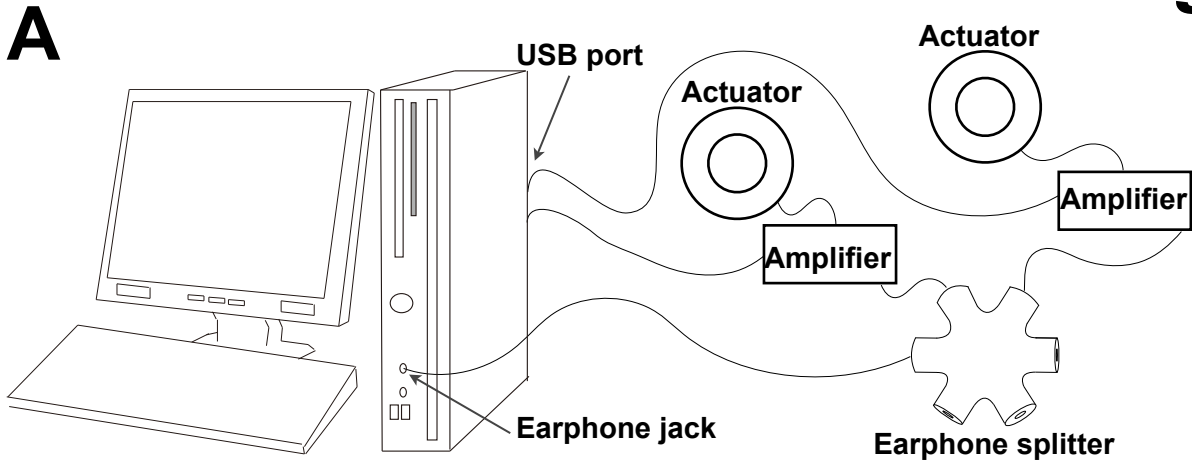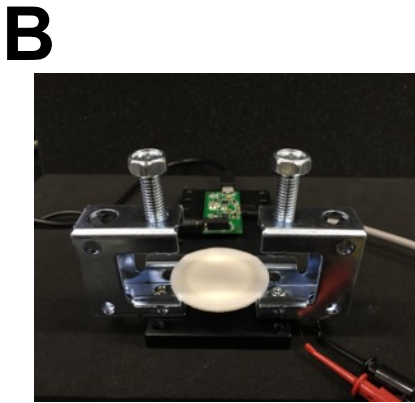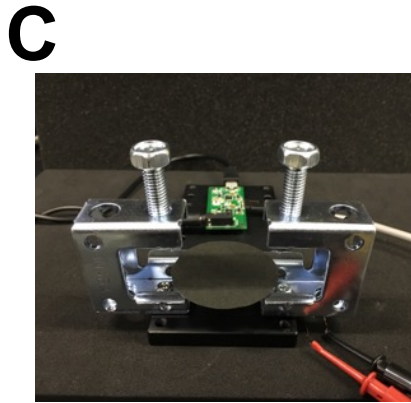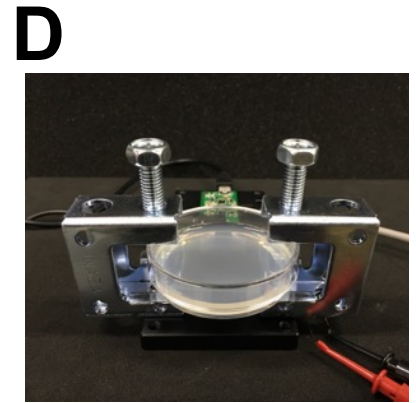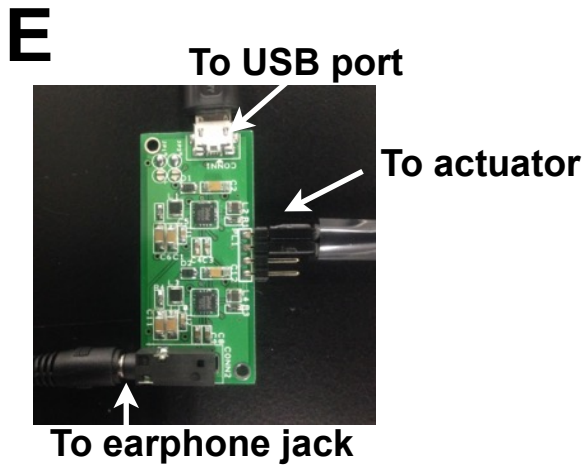



**Fig. 3**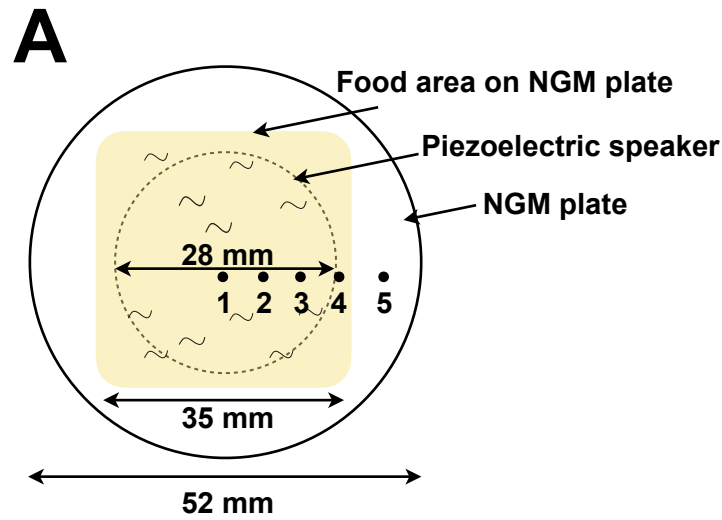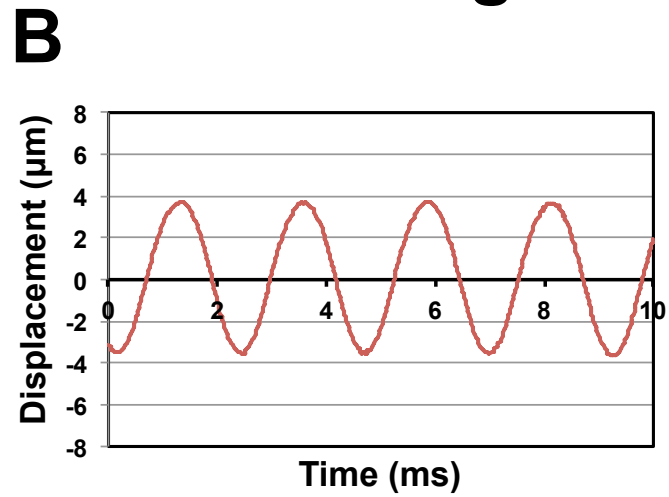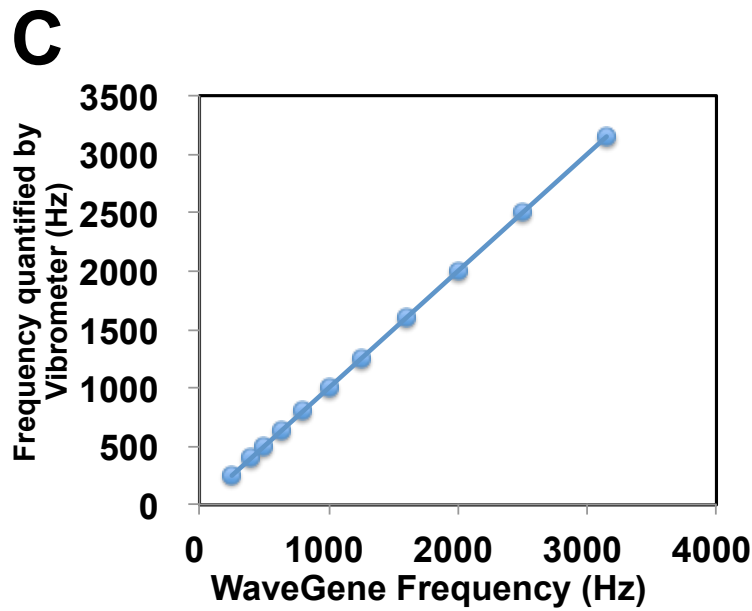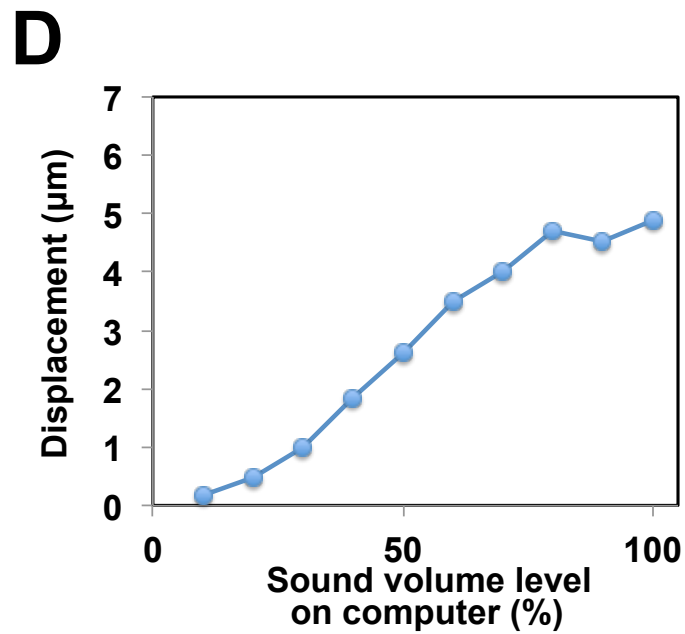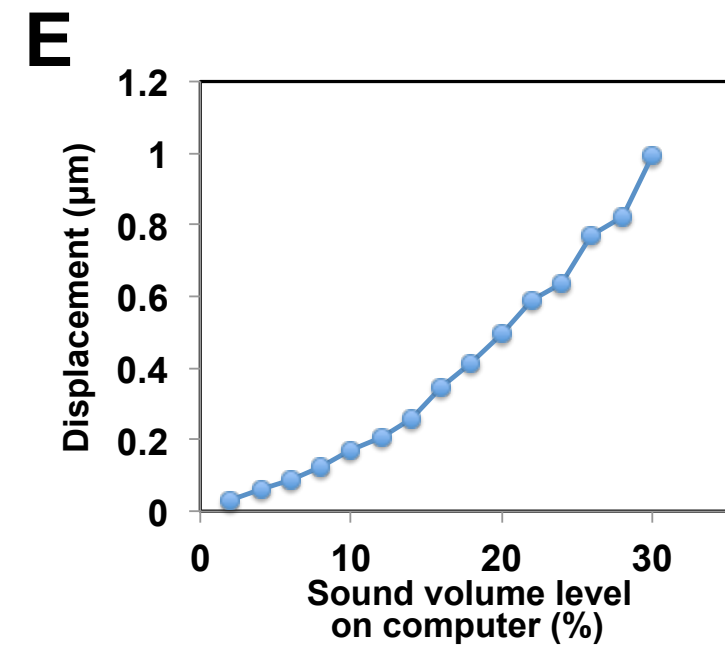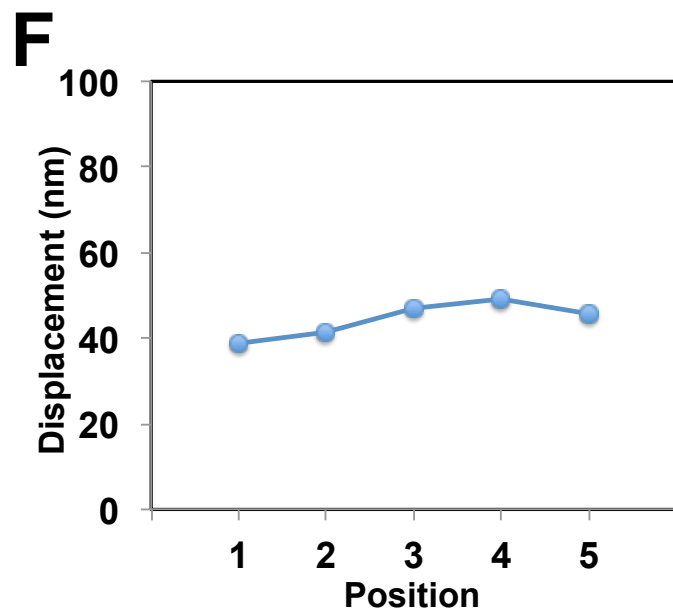

**Fig. 4****A**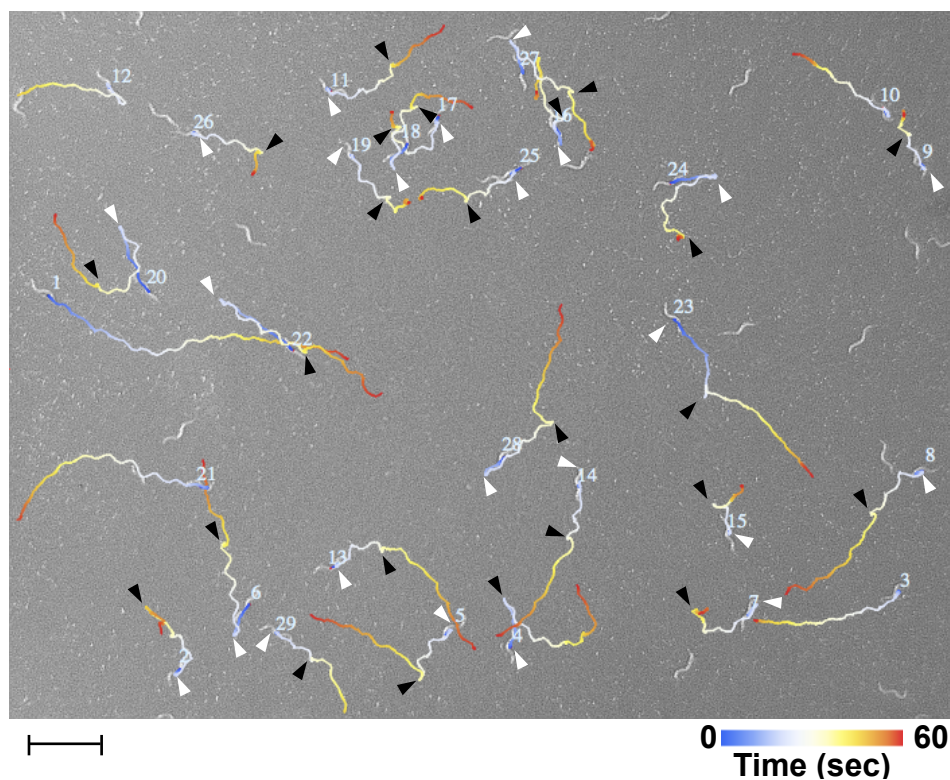**B**

Synchronously  
cultivated  
adult worms

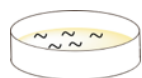

Behavior  
test (NT)

Stimuli at 60 sec ISI

(x20)

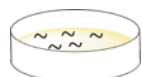

1hrs

16 hrs

Behavior  
test (T)

**C**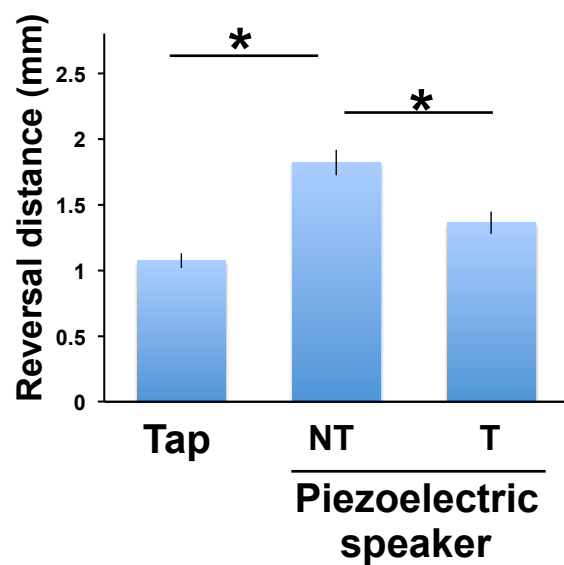

Source: https://www.biorxiv.org/content/10.1101/047431v1.full.pdf
